# Supplementary material for: Cytotoxic T Lymphocytes Block Tumor Growth Both by Lytic Activity and IFNγ-Dependent Cell-Cycle Arrest
Source: Oxford University Press journal article supplement (doi:10.1158/2326-6066.cir-14-0098), 2014-08-15
Supplement: 23266066cir140098-sup-131781_1_supp_0_nscs3s.pdf [file 23266066cir140098-sup-131781_1_supp_0_nscs3s.pdf]

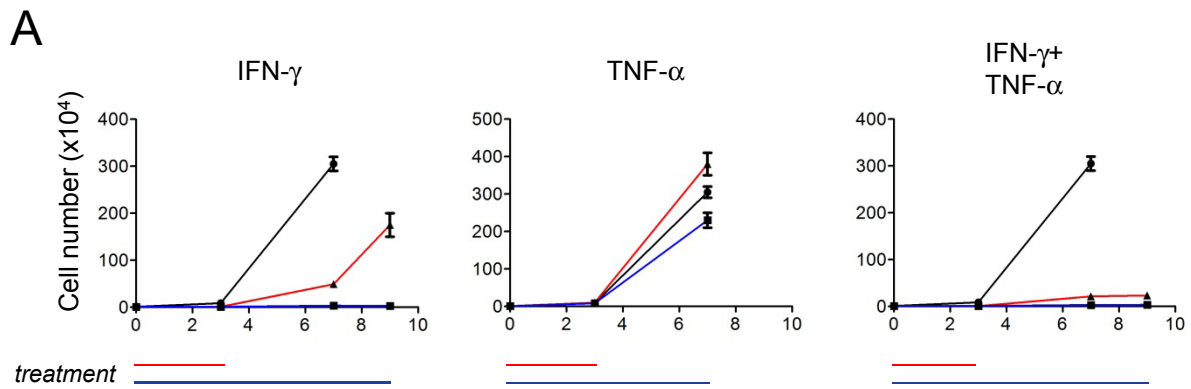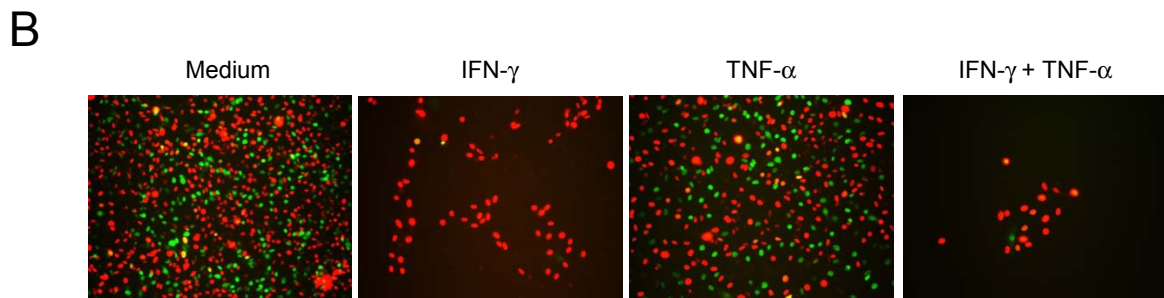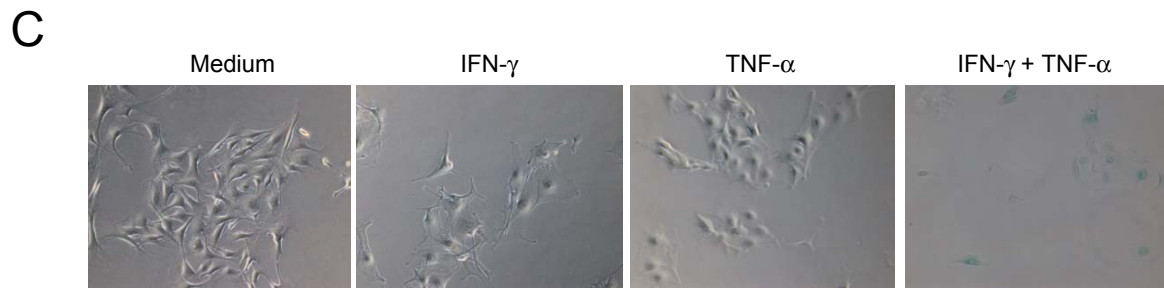

**Supplementary Figure S3.** Effect of IFN- $\gamma$  plus TNF- $\alpha$  on B16 tumor cells. Proliferation of B16-fucci tumor cells was quantified after their exposure to 10 U/ml IFN- $\gamma$  and/or 10 ng/ml TNF- $\alpha$  for 6-9 days. The red line represents treatment with 10 U/ml IFN- $\gamma$  and/or 10 ng/ml TNF- $\alpha$  for only 3 days, after which cells were washed and further cultured with fresh medium. The blue line shows treatment with 10 U/ml IFN- $\gamma$  and/or 10 ng/ml TNF- $\alpha$  for the whole time (A). The cell-cycle state (B) and SA- $\beta$ -gal activity (C) of B16-fucci tumor cells after 48 h and 96 h, respectively, of treatment with medium, IFN- $\gamma$  (10 U/ml), TNF- $\alpha$  (10 ng/ml), or IFN- $\gamma$  (10 U/ml) plus TNF- $\alpha$  (10 ng/ml).
